# Supplementary material for: TOP1α regulates FLOWERING LOCUS C expression by coupling histone modification and transcription machinery
Source: Oxford University Press journal article supplement (doi:10.1242/dev.167841), 2019-01-31
Supplement: dev167841supp.pdf [file dev167841supp.pdf]

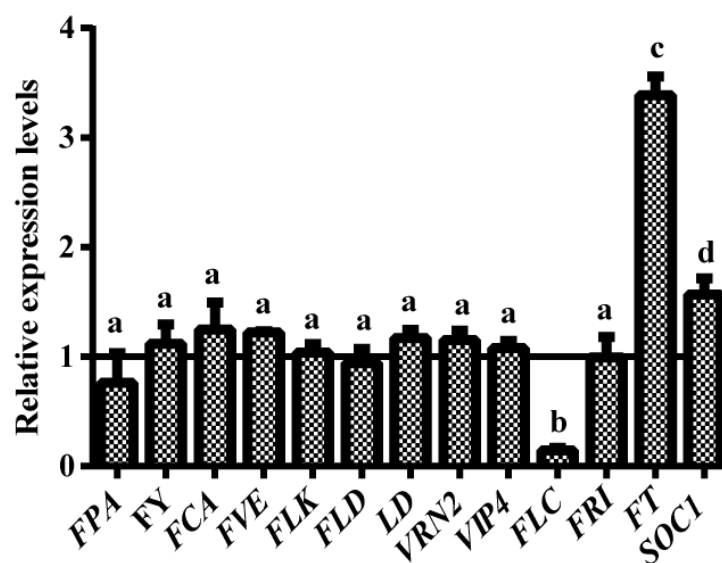

**Fig. S1. *FLC* is down regulated in the *top1a* mutant.** The qRT-PCRs were used to measure the relative expression levels of *FPA*, *FY*, *FCA*, *FVE*, *FLK*, *FLD*, *LD*, *VRN2*, *VIP4*, *FLC*, *FRI*, *FT* and *SOC1* in *top1a* mutants. The expression levels of these genes in the wild-type Col-0 were normalized to 1 and marked with the black line. Mean  $\pm$  SD with three independent biological replicates. Bars marked with different letters are statistically different to each other ( $P < 0.05$  by Student's *t* test). Total RNA was isolated from 8-day-old seedlings grown in 1/2 MS media under long-day conditions. *TUBULIN* was used to normalize the mRNA levels. The primer sequences used are listed in Table S1.

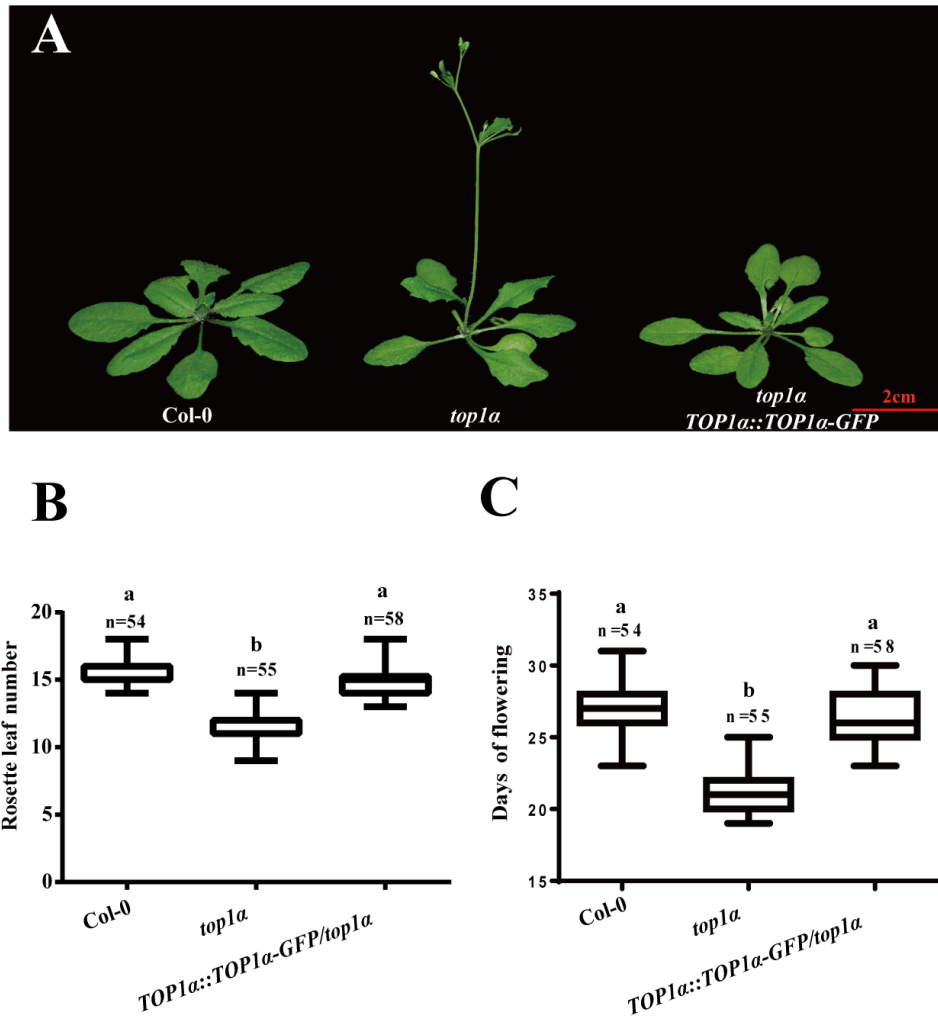

**Fig. S2. The *pTOP1a::TOP1a-GFP* transgenic plants rescue early flowering phenotypes of *top1a* mutants.** (A) The early flowering phenotypes of *top1a* mutants were rescued by the *pTOP1a::TOP1a-GFP* transgene. Bar, 2 cm. (B-C) The rosette leaf numbers and days of flowering were measured in Col-0, *top1a* and *pTOP1a::TOP1a-GFP/top1a* transgenic plants. Mean  $\pm$  SD. Bars marked with different letters are statistically different to each other ( $P < 0.05$  by Student's t test). Plants were grown in the soil under long-day conditions. n, the number of plants.

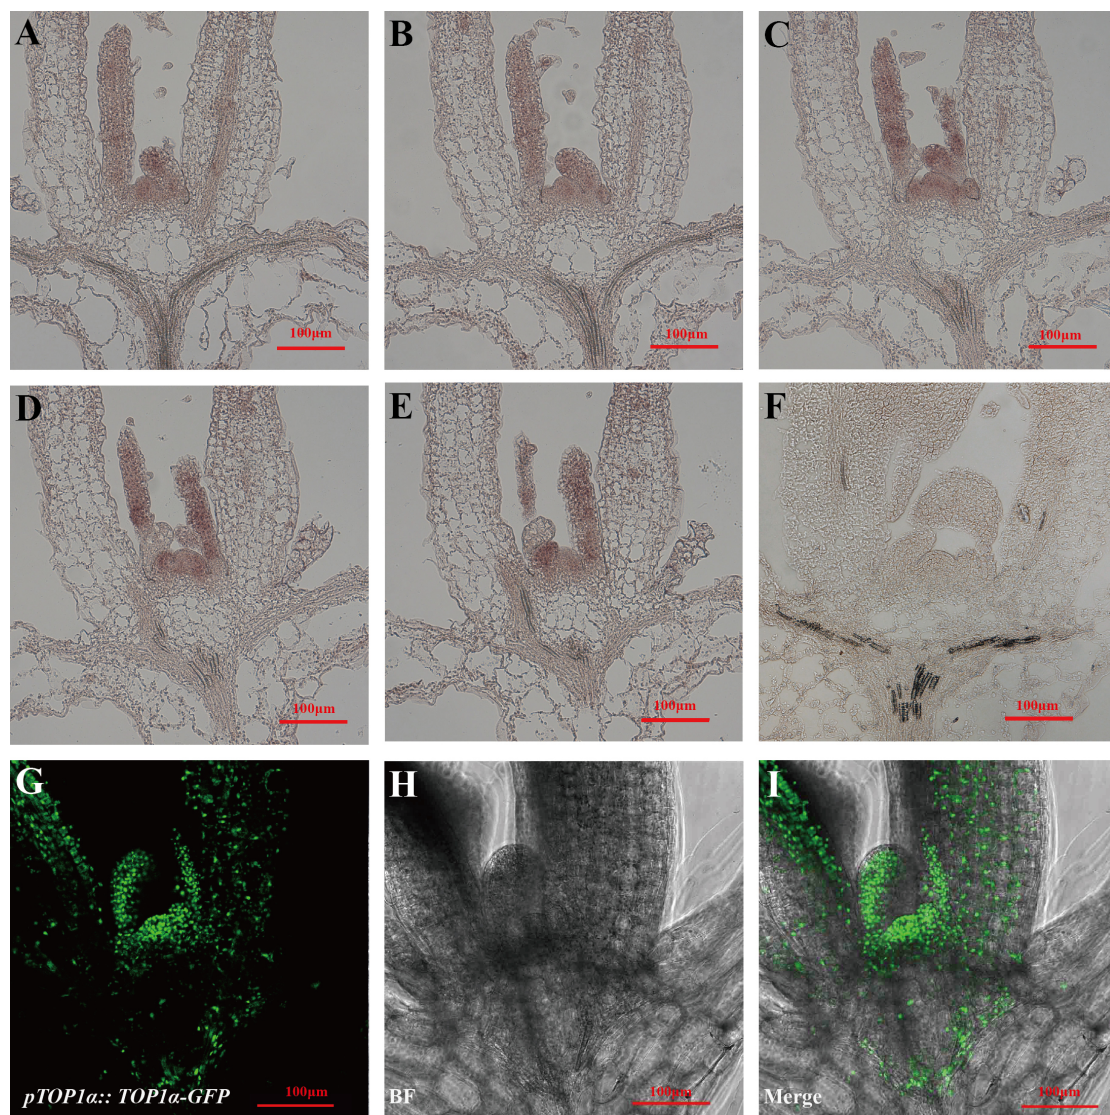

**Fig. S3. *TOP1α* expression patterns in the shoot apex.** (A-E) *TOP1α* expression patterns in the Col-0 seedlings using *in situ* hybridization. Serial sections were shown. Bar, 100 μm. (F) The sense control of *TOP1α* in the *in situ* hybridization. (G-I) The protein localization of *TOP1α* in the *pTOP1α::TOP1α-GFP/top1α* rescued plant. Bar, 100 μm.

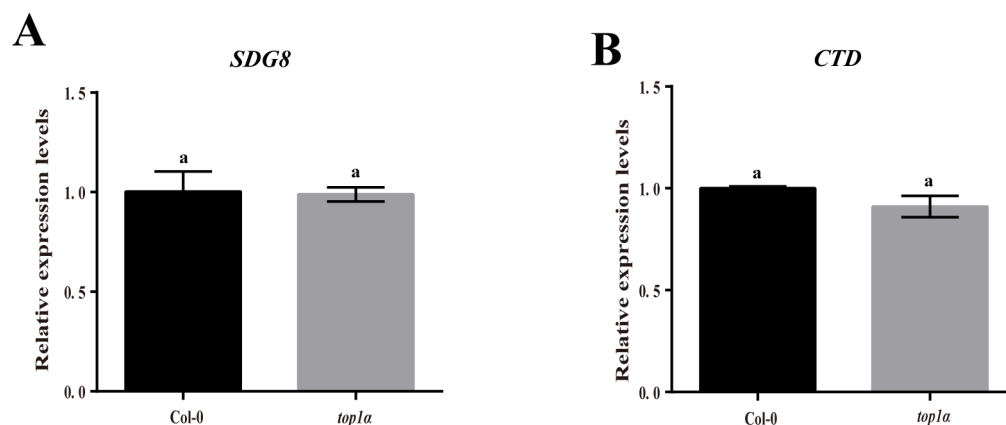

**Fig. S4. TOP1 $\alpha$  does not regulate *SDG8* and *CTD* at the transcription level.** The relative expression levels of *SDG8* (A) and *CTD* (B) in *top1α* mutants were detected by qRT-PCR. Mean  $\pm$  SD with three independent biological replicates. Bars marked with same letters are not statistically different to each other ( $P > 0.05$  by Student's t test). Total RNA was isolated from 8-day-old seedlings grown in 1/2 MS media under long-day conditions. *TUBULIN* was used to normalize the mRNA levels. The primer sequences used are listed in Table S1.



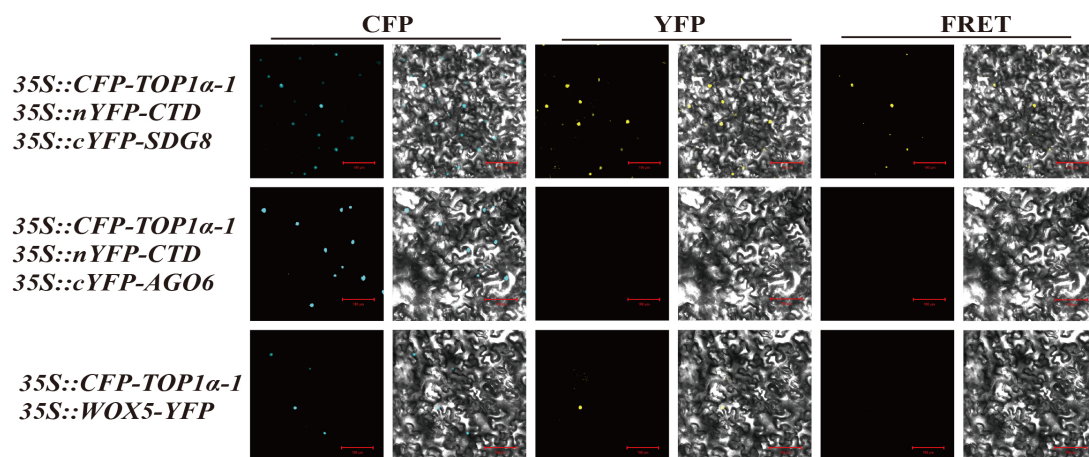

**Fig. S5. TOP1 $\alpha$ , CTD and SDG8 are in the same complex.** BiFC-based FRET was performed to examine the interaction of TOP1 $\alpha$ , CTD and SDG8 proteins in the same complex. The *35S::CFP-TOP1 $\alpha$ -1*, *35S::nYFP-CTD* and *35S::cYFP-SDG8* were co-transformed into the abaxial leaves of *N. benthamiana*. The *35S::cYFP-AGO6* and *35S::WOX5-YFP* were used as negative controls. The excitation wavelength of 448 nm (CFP) and the emission wavelength of 514 nm (YFP) were used in the FRET channel. Bar, 100  $\mu$ m.

# B

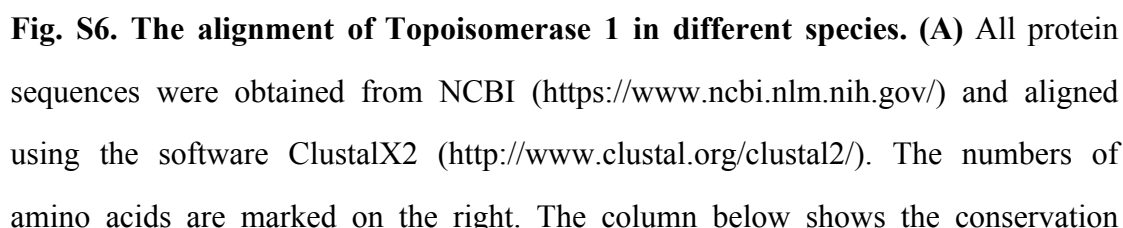

among different species. The dot (‘.’), conservative; ‘:’, obviously conservative; ‘\*’, absolutely conservative. The red frame shows the 370th amino acid of TOP1 $\alpha$  in *Arabidopsis thaliana* and conserved amino acids among different species. **(B)** Phylogenetic tree and genetic distance of Topoisomerase 1 protein sequences among different species. The numbers above indicate the genetic distance.

**Table S1. Oligonucleotides used in this study****Primers for ChIP and qRT-PCR**

| Number | Name                           | Forward (F) and reverse (R) primers     |
|--------|--------------------------------|-----------------------------------------|
| H3111  | <i>FLC</i> 1 (-662 to -412)    | F: 5'-AGGCGAGTGGTTCTTTGTTT-3'           |
| H3112  |                                | R: 5'-CCTCCCCTACGATACGGATT-3'           |
| H6342  | <i>FLC</i> 2 (-269 to -201)    | F: 5'-CTCGTCATGCGGTACACGTGGC-3'         |
| H6461  |                                | R: 5'-AAAAACCAAATATGTGAATAAAAC-3'       |
| H5744  | <i>FLC</i> 3 (-200 to -1)      | F: 5'-TTGCATCACTCTCGTTTACCC-3'          |
| H5745  |                                | R: 5'-GGCTTCTCTCCGAGAGGGC-3'            |
| H1248  | <i>FLC</i> 4 (+71 to +150)     | F: 5'-TCGCAACGGTCTCATCGA-3'             |
| H1249  |                                | R: 5'-GGCGGAGACGACGAGAAG-3'             |
| H3115  | <i>FLC</i> 5 (+201 to +388)    | F: 5'-ACCTGGGTTTTTCATTTGTTCC-3'         |
| H3116  |                                | R: 5'-TTTGGTTATCTCATGTATCTATC-3'        |
| H3117  | <i>FLC</i> 6 (+688 to +865)    | F: 5'-TCATTGGATCTCTCGGATTTG-3'          |
| H3118  |                                | R: 5'-ACTAATTTGGATAATCACCAAG-3'         |
| H3119  | <i>FLC</i> 7 (+1306 to +1524)  | F: 5'-TTCCCACTCTTGCA GTTACACACA-3'      |
| H3120  |                                | R: 5'-AAGACACAAGATACAAAGGTTGT-3'        |
| H3121  | <i>FLC</i> 8 (+2562 to +1746)  | F: 5'-TGA ACTCATGAAAGAGGCGTT-3'         |
| H3122  |                                | R: 5'-TACAAAGCGTGTTATCAAAACC-3'         |
| H6339  | <i>FLC</i> 9 (+5506 to +5616)  | F: 5'-ATGGAGAATAATCATCATGTG-3'          |
| H6340  |                                | R: 5'-CTAATTAAGTAGTGGGAGAG-3'           |
| H3123  | <i>FLC</i> 10 (+5733 to +5869) | F: 5'-GTTTGTATATCTTAATACTCTCTCTTTGGC-3' |
| H3124  |                                | R: 5'-ATGCAATTCTCACACGAATAAG-3'         |
| H2660  | <i>FPA</i>                     | F: 5'-ACCAAGCACTACGATTGCAGC-3'          |
| H2661  |                                | R: 5'-ACCTGAAGACTGTTGCTGCTG-3'          |
| H2662  | <i>FY</i>                      | F: 5'-TCAAGGACAACCAAACAGTG-3'           |
| H2663  |                                | R: 5'-TGCCTACTGATGTTGCTGATTG-3'         |
| H2664  | <i>FCA</i>                     | F: 5'-AGCAGCAACCGCTACAAAAGATG-3'        |

|       |               |                                      |
|-------|---------------|--------------------------------------|
| H2665 |               | R: 5'-TGCGAGAACTGGCACAAAC-3'         |
| H2821 | <i>FVE</i>    | F: 5'-TGCGAGAACTGGCACAAAC-3'         |
| H2822 |               | R: 5'-AGGCGAACCAACTCCATTAG-3'        |
| H2823 | <i>FLK</i>    | F: 5'-ACGTCGGGTCAAACATAAG-3'         |
| H2824 |               | R: 5'-TTGCTGCTCTGGTGCTAC-3'          |
| H2825 | <i>FLD</i>    | F: 5'-ACGCAGTGACTCGTGTTTC-3'         |
| H2826 |               | R: 5'-AGGGTATCGCCTTGTTG-3'           |
| H2827 | <i>LD</i>     | F: 5'-TCGTACAGGGTCCAAAAC-3'          |
| H2828 |               | R: 5'-TATAAAGGGCACGCATC-3'           |
| H2670 | <i>VRN2</i>   | F: 5'-ATGGACTTGTGACTCAGCCAC-3'       |
| H2671 |               | R: 5'-TGTCATTTCGGATGATCCACAATG-3'    |
| H2672 | <i>VIP4</i>   | F: 5'-TGAAGAAGAGGAAGAGGTTGC-3'       |
| H2673 |               | R: 5'-TCGTCACTGTCATCAATCACG-3'       |
| H2656 | <i>FRI</i>    | F: 5'-TGACTGAAGGAGGATTAGCTG-3'       |
| H2657 |               | R: 5'-TCTCATTCGAACCACTCATC-3'        |
| H1248 | <i>FLC</i>    | F: 5'-TCGCAACGGTCTCATCGA-3'          |
| H1249 |               | R: 5'-GGCGGAGACGACGAGAAG-3'          |
| H0999 | <i>FT</i>     | F: 5'-TACGAAAATCCAAGTCCCCTG-3'       |
| H1000 |               | R: 5'-AAACTCGCGAGTGTTGAAGTTC-3'      |
| H0504 | <i>SOC1</i>   | F: 5'-AGGAACATGCTCAATCGAGG-3'        |
| H0505 |               | R: 5'-CTTATACACTCTCAGTACTGC-3'       |
| H5028 | <i>SDG8</i>   | F: 5'-ACCTGACTTACTCCAATGAGATC-3'     |
| H0723 |               | R: 5'-TTAACTGTTGAGCTTCTTCTCTAAA-3'   |
| H6529 | <i>CTD</i>    | F: 5'-AGCAAGCCCAGACTACAGC-3'         |
| H6530 |               | R: 5'-CAGGGTTGCCTTTATCATCC-3'        |
| H0069 | <i>Tublin</i> | F: 5'-GAGCCTTACAAGCTACTCTGTCTGTC-3'  |
| H0070 |               | R: 5'-ACACCAGACATAGTAGCAGAAATCAAG-3' |



**Primers for *in situ* hybridization**

| Number | Name         | Forward (F) and reverse (R) primers |
|--------|--------------|-------------------------------------|
| H0079  | <i>TOP1α</i> | T7: 5'-TAATACGACTCACTATAGGG-3'      |
| H0080  |              | Sp6: 5'-ATTTAGGTGACACTATAGAATACT-3' |

**Primers for cloning**

| Number | Name           | Forward (F) and reverse (R) primers               |
|--------|----------------|---------------------------------------------------|
| H5603  | <i>SDG8</i>    | F: 5'-GCGTCGACCTAAAAAACCATGTTGGGGATTCA-3'         |
| H5604  |                | R: 5'-TTTTCCTTTTGCGGCCGCAAATTAACTTTCAAACGAAGGC-3' |
| H5308  | <i>TOP1α-1</i> | F:                                                |
| H4036  |                | 5'-ATAAGAATGCGGCCGCCATGGGCACTGAAACAGTTTCAAAACC-3' |
|        |                | R: 5'-CCGCTCGAGTTATTTCTTTGCCCATCTCCAGAGGAAG-3'    |
| H5309  | <i>TOP1α-2</i> | F:                                                |
| H4038  |                | 5'-ATAAGAATGCGGCCGCcAAATGGACTACTTTGGTGCACAACGG-3' |
|        |                | R: 5'-CCGCTCGAGTTATCCCAAAAATACATACTTGAATTC-3'     |
| H5310  | <i>TOP1α-3</i> | F:                                                |
| H4041  |                | 5'-ATAAGAATGCGGCCGCCCTTTTCAGAGGCCGTGGAGAACATCC-3' |
|        |                | R: 5'-ACGCGTCGACACACACATGGTGCGCAAATTGAAAAATTG-3'  |
| H5579  | <i>CTD</i>     | F: 5'-ACGCGTCGACaGTTTATCCCCAATGTCAGATGCAC-3'      |
| H5580  |                | R: 5'-ATAGTTTAGCGGCCGCCAGGGTTGCCTTTATCATCCTTAC-3' |
| H3109  | <i>FLC</i>     | F: 5'-ACGCGTCGACATGGGAAGAAAAAACTAGAAATC-3'        |
| H3110  |                | R: 5'-TTTTCCTTTTGCGGCCGCCTAATTAAGTAGTGGGAGAG-3'   |
